# Supplementary material
Source: HighWire-hosted journal article supplement (https://ard.bmj.com/highwire/filestream/202481/field_highwire_adjunct_files/5/Table_S4.xlsx)
Supplement: Table_S4.xlsx [file Table_S4.xlsx]

## Sheet: Feuil1
	Supplemental Table 4. Allele frequencies of HLA-A, -B, -E, -F, and -G in all subjects and in HLA-B*5101 non-carriers.
	Allele	All subjects									HLA-B*5101 non-carriers
		No. (frequency)				OR (95%CI)		P	Pc		No. (frequency)				OR (95%CI)		P	Pc
		BD (n=600)		Cont. (n=600)							BD (n=272)		Cont. (n=510)
	HLA-A
	A*0101	4	(0.007)	1	(0.002)						2	(0.007)	1	(0.002)
	A*0201	68	(0.113)	61	(0.102)						35	(0.130)	50	(0.098)
	A*0203	0	(0.0)	2	(0.003)						0	(0.0)	2	(0.004)
	A*0206	48	(0.080)	52	(0.087)						19	(0.070)	43	(0.084)
	A*0207	20	(0.033)	12	(0.020)						10	(0.037)	11	(0.022)
	A*0210	1	(0.002)	1	(0.002)						0	(0.0)	1	(0.002)
	A*0301	1	(0.002)	4	(0.007)						1	(0.004)	3	(0.006)
	A*0302	0	(0.0)	1	(0.002)						0	(0.0)	1	(0.002)
	A*1101	39	(0.065)	66	(0.110)	0.56	(0.37-0.85)	0.0077	NS		22	(0.081)	61	(0.120)
	A*1102	0	(0.0)	2	(0.003)						0	(0.0)	2	(0.004)
	A*2401	3	(0.005)	0	(0.0)						1	(0.004)	0	(0.0)
	A*2402	207	(0.346)	239	(0.398)						91	(0.337)	203	(0.398)
	A*2420	1	(0.002)	4	(0.007)						0	(0.0)	4	(0.008)
	A*2601	79	(0.132)	44	(0.073)	1.92	(1.31-2.83)	0.00084	0.016		48	(0.178)	39	(0.076)	2.61	(1.66-4.10)	2.84x10-5	0.00051
	A*2602	18	(0.030)	9	(0.015)						13	(0.048)	7	(0.014)	3.63	(1.43-9.22)	0.0051	NS
	A*2603	21	(0.035)	12	(0.020)						9	(0.033)	8	(0.016)
	A*2605	2	(0.003)	0	(0.0)						0	(0.0)	0	(0.0)
	A*3101	70	(0.117)	45	(0.075)	1.64	(1.10-2.42)	0.014	NS		11	(0.041)	30	(0.059)
	A*3303	16	(0.027)	45	(0.075)	0.34	(0.19-0.61)	0.00018	0.0035		8	(0.030)	44	(0.086)	0.32	(0.15-0.70)	0.0038	NS
	HLA-B
	B*3501	46	(0.077)	38	(0.063)						37	(0.136)	33	(0.065)	2.28	(1.39-3.73)	0.0014	NS
	B*4403	20	(0.033)	43	(0.072)	0.45	(0.26-0.77)	0.00407083	NS		9	(0.033)	42	(0.082)	0.38	(0.18-0.80)	0.0091	NS
	B*5101	188	(0.313)	46	(0.077)	5.50	(3.89-7.77)	4.29x10-26	1.63x10-24		0	(0.0)	0	(0.0)
	B*5201	40	(0.067)	84	(0.140)	0.44	(0.30-0.65)	3.89x10-5	0.0015		23	(0.085)	78	(0.153)	0.51	(0.31-0.84)	0.0070	NS
	B*5401	17	(0.028)	46	(0.077)	0.35	(0.20-0.62)	0.000232828	0.0088		12	(0.044)	43	(0.084)	0.50	(0.26-0.97)	0.040	NS
	B*5601	2	(0.003)	11	(0.018)	0.18	(0.04-0.81)	0.0217665	NS		1	(0.004)	10	(0.020)
	HLA-E
	E*010101	172	(0.287)	176	(0.293)						94	(0.346)	157	(0.308)
	E*010301	227	(0.378)	253	(0.422)						116	(0.426)	217	(0.425)
	E*010302	201	(0.335)	171	(0.285)						62	(0.228)	136	(0.267)
	HLA-F
	F*010101	278	(0.463)	226	(0.377)	1.43	(1.13-1.80)	0.0028	0.011		141	(0.518)	186	(0.365)	1.87	(1.39-2.53)	3.88x10-5	0.00016
	F*010102	74	(0.123)	154	(0.257)	0.41	(0.30-0.55)	4.58x10-9	1.83x10-8		37	(0.136)	144	(0.282)	0.40	(0.27-0.60)	5.22x10-6	2.09x10-5
	F*010103	247	(0.412)	214	(0.357)						93	(0.342)	175	(0.343)
	F*0103	1	(0.002)	6	(0.010)						1	(0.004)	5	(0.010)
	HLA-G
	G*010101	153	(0.255)	151	(0.252)						73	(0.268)	130	(0.255)
	G*010102	185	(0.308)	106	(0.177)	2.08	(1.58-2.73)	1.31x10-7	1.44x10-6		80	(0.294)	80	(0.157)	2.24	(1.57-3.19)	1.06x10-5	0.00012
	G*010103	16	(0.027)	29	(0.048)						9	(0.033)	26	(0.051)
	G*010105	1	(0.002)	1	(0.002)						1	(0.004)	1	(0.002)
	G*010107	0	(0.0)	1	(0.002)						0	(0.0)	1	(0.002)
	G*010108	13	(0.022)	9	(0.015)						3	(0.011)	1	(0.002)
	G*0103	6	(0.010)	0	(0.0)	-		0.031	NS		1	(0.004)	0	(0.0)
	G*010401	220	(0.367)	292	(0.487)	0.61	(0.48-0.77)	3.34x10-5	0.00037		101	(0.371)	261	(0.512)	0.56	(0.42-0.76)	0.00022	0.0024
	G*010403	2	(0.003)	9	(0.015)						2	(0.007)	8	(0.016)
	G*0106	4	(0.007)	1	(0.002)						2	(0.007)	1	(0.002)
	novel allele	0	(0.0)	1	(0.002)						0	(0.0)	1	(0.002)
	BD: Behçet's disease; Cont.: controls; OR: odds ratio; CI: confidence interval; Pc: corrected P value; NS: not significant. In HLA-B, only alleles associated with BD are listed.
